# Supplementary material
Source: PubMed Central journal article supplement (PMC7863013)
Supplement: jamaoncol-e206968-s001.pdf [file jamaoncol-e206968-s001.pdf]

## Supplementary Online Content

Elimova E, Moignard S, Li X, et al. Updating reports of phase 3 clinical trials for cancer. *JAMA Oncol*. Published online February 4, 2021. doi:10.1001/jamaoncol.2020.6968

### **eTable.** Randomized Clinical Trials in Oncology Published Between 1990 and 2010

This supplementary material has been provided by the authors to give readers additional information about their work.

**eTable.** Randomized Clinical Trials in Oncology Published Between 1990 and 2010

| Covariate                                          | Initial Sample (n=207) | Updated reports (n=41) |             | Percent of trials updated (20%) |
|----------------------------------------------------|------------------------|------------------------|-------------|---------------------------------|
|                                                    |                        | Initial report         | Update      |                                 |
| <b>Journal<sup>a</sup>, Number of articles (%)</b> |                        |                        |             |                                 |
| JCO                                                | 123 (59)               | 14 (34)                | 17 (41)     |                                 |
| NEJM                                               | 22 (11)                | 15 (37)                | 0           |                                 |
| Lancet/ Lancet Oncology                            | 14 (7)                 | 5 (12)                 | 5 (12)      |                                 |
| Annals of Oncology                                 | 40 (19)                | 0 (0)                  | 6 (15)      |                                 |
| Other journal (or update in abstract)              | 8 (4)                  | 7 (17)                 | 13 (32)     |                                 |
| <b>No. of patients, Median (Range)</b>             | 429 (100,5187)         | 633 (156-5187)         |             |                                 |
| <b>Median follow-up time, months</b>               | 22 (3, 120)            | 36 (3, 91)             | 68 (11-166) |                                 |
| <b>Tumor site</b>                                  |                        |                        |             |                                 |
| breast                                             | 87 (42)                | 27 (66)                |             | 31%                             |
| lung                                               | 109 (53)               | 11 (27)                |             | 10%                             |
| prostate                                           | 11 (5)                 | 3 (7)                  |             | 27%                             |
| <b>Regimen under evaluation</b>                    |                        |                        |             |                                 |
| chemotherapy                                       | 159 (77)               | 22 (54)                |             | 14%                             |
| hormonal agent                                     | 21 (10)                | 10 (24)                |             | 48%                             |
| targeted agent                                     | 27 (13)                | 9 (22)                 |             | 33%                             |
| <b>Disease Setting</b>                             |                        |                        |             |                                 |
| advanced                                           | 146 (71)               | 14 (34)                |             | 10%                             |
| early                                              | 61 (29)                | 27 (66)                |             | 44%                             |
| <b>Primary Endpoint<sup>b</sup></b>                |                        |                        |             |                                 |
| OS                                                 | 97 (47)                | 10 (26)                |             | 10%                             |
| DFS, EFS, RFS                                      | 38 (19)                | 17 (44)                |             | 45%                             |
| PFS, TTP, TTF                                      | 70 (34)                | 12 (31)                |             | 17%                             |
| Positive outcome (p≤0.05)                          | 84 (41)                | 33 (80)                |             | 39%                             |
| Negative outcome (p>0.05)                          | 123 (59)               | 8 (20)                 |             | 7%                              |
| <b>Secondary Endpoint</b>                          |                        |                        |             |                                 |
| OS                                                 | 103 (50)               | 31 (76)                |             |                                 |
| DFS, EFS, RFS                                      | 8 (4)                  | 6 (15)                 |             |                                 |
| PFS, TTP, TTF                                      | 76 (37)                | 4 (10)                 |             |                                 |
| Other/not specified                                | 20 (10)                | 0 (0)                  |             |                                 |

<sup>a</sup>Other journals included the index journal JAMA

<sup>b</sup>2 trials (2 updated) had other primary endpoints

Note: The positive or negative trials are decided based on adjusted p-values where they are given and the unadjusted p-values are used for trials where no adjustment was made.
